# Supplementary material for: Anion-correlated conduction band edge shifts and charge transfer kinetics in dye-sensitized solar cells with ionic liquid electrolytes
Source: Royal Society of Chemistry journal article supplement (doi:10.1039/c0cp02728f), 2010-12-24
Supplement: c0cp02728f.pdf [file c0cp02728f.pdf]

## **Electronic Supplementary Information**

# **Anion-correlated conduction band edge shifts and charge transfer kinetics in dye-sensitized solar cells with ionic liquid electrolytes**

Min Zhang,<sup>a</sup> Jing Zhang,<sup>a</sup> Yu Bai,<sup>ab</sup> Yinghui Wang,<sup>a</sup> Mei Su<sup>ab</sup> and Peng Wang<sup>\*a</sup>

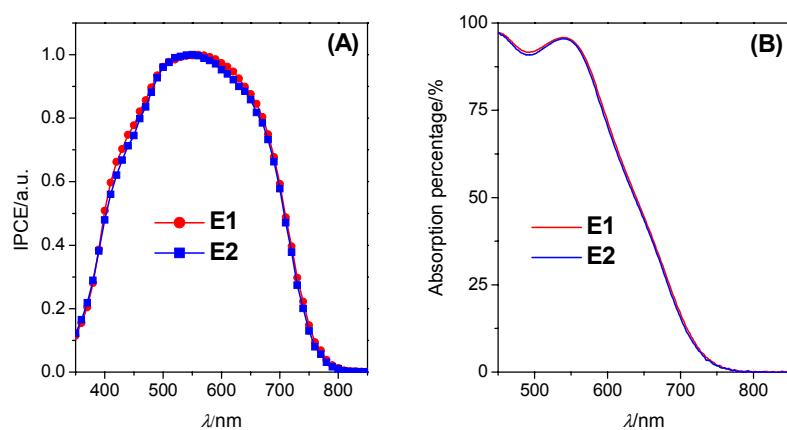

**Fig. S1** (A) Normalized photocurrent action spectra. (B) Absorption of a 7- $\mu$ m-thick, C106-coated titania film immersed in electrolytes E1 or E2. The absorptions from the FTO matrix, titania and electrolyte have been subtracted for clarity of presentation.

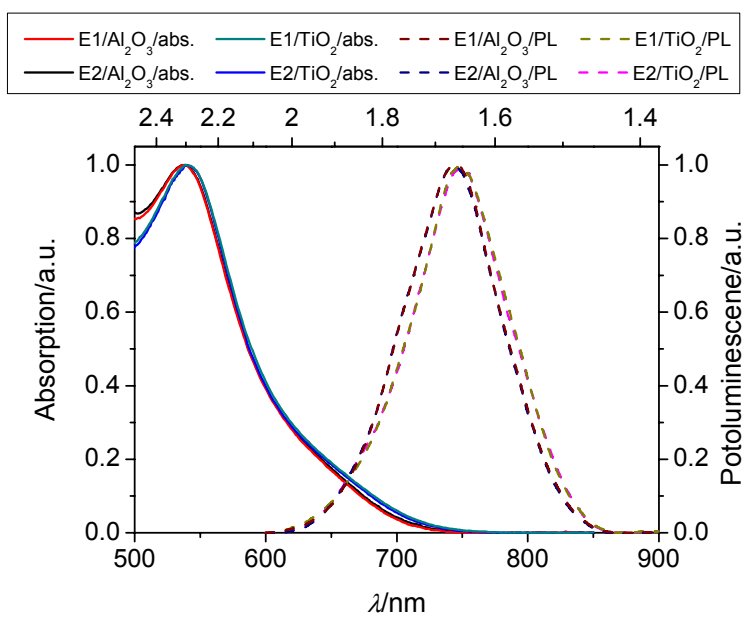

**Fig. S2** Normalized absorptions and emissions of C106-based cells made with electrolytes E1 and E2. Excitation wavelength: 488 nm.

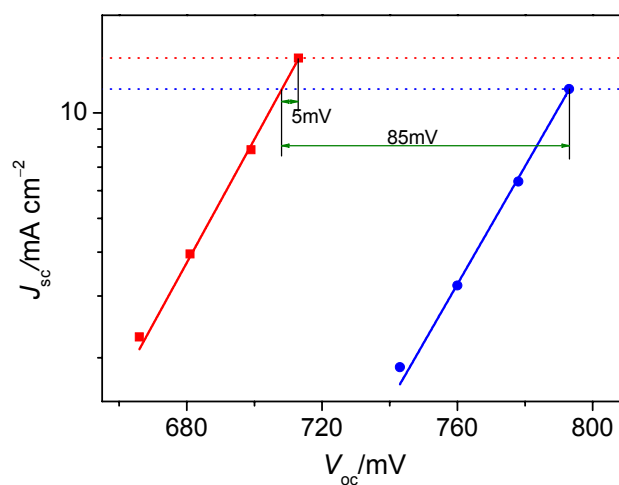

**Fig. S3** Plots of  $J_{sc}$  versus  $V_{oc}$  obtained at different light intensities. The solid lines are fittings in terms of a proper function. The red and blue dot lines represent the  $J_{sc}$  values of cells with E1 (14.34 mA cm<sup>-2</sup>) and E2 (11.70 mA cm<sup>-2</sup>), respectively.

**Table S1.** Parameters fitted from  $R_t$  and  $R_{ct}$ .

| electrolyte | $E_c - E_{F,redox}/eV$ | $\gamma$ | $K/cm^{-3} s^{-1}$ | $k_0/cm^{-3(1-\gamma)} s^{-1}$ |
|-------------|------------------------|----------|--------------------|--------------------------------|
| E1          | 1.013                  | 0.80     | $6.94 \times 10^9$ | $7.30 \times 10^6$             |
| E2          | 1.101                  | 0.84     | $2.54 \times 10^8$ | $3.35 \times 10^6$             |
